# Supplementary material for: Comparison of Dietary Micronutrient Intakes by Body Weight Status among Mexican-American and Non-Hispanic Black Women Aged 19–39 Years: An Analysis of NHANES 2003–2014
Source: PubMed Central journal article supplement (PMC6950012; doi:10.3390/nu11122846), 2019-11-20
Supplement: nutrients-11-02846-s001.pdf [file nutrients-11-02846-s001.pdf]

**Table S1.** Estimated daily usual micronutrient intakes from foods, and micronutrient density among non-Hispanic White women aged 19-39 years by body weight status, NHANES 2003-2014 (n = 1,916)

| Micronutrients                    | Mean $\pm$ SE <sup>a</sup>       |                         |                    | <i>p</i> -value* |
|-----------------------------------|----------------------------------|-------------------------|--------------------|------------------|
|                                   | Normal/under-weight<br>(n = 908) | Overweight<br>(n = 441) | Obese<br>(n = 567) |                  |
| Vitamin A, $\mu$ g                | 600.4 $\pm$ 31.0                 | 572.9 $\pm$ 25.8        | 547.1 $\pm$ 27.7   | 0.0002           |
| Vitamin B <sub>2</sub> , mg       | 2.1 $\pm$ 0.1                    | 2.0 $\pm$ 0.1           | 2.0 $\pm$ 0.1      | 0.049            |
| Vitamin B <sub>6</sub> , mg       | 1.8 $\pm$ 0.1                    | 1.7 $\pm$ 0.1           | 1.7 $\pm$ 0.1      | 0.0004           |
| Vitamin B <sub>12</sub> , $\mu$ g | 4.6 $\pm$ 0.2                    | 4.6 $\pm$ 0.2           | 4.6 $\pm$ 0.2      | 0.81             |
| Vitamin C, mg                     | 71.4 $\pm$ 4.2                   | 66.2 $\pm$ 3.8          | 61.3 $\pm$ 4.4     | <0.0001          |
| Vitamin D, $\mu$ g                | 4.2 $\pm$ 0.3                    | 4.1 $\pm$ 0.2           | 4.1 $\pm$ 0.3      | 0.44             |
| Folate, $\mu$ g                   | 389.9 $\pm$ 11.5                 | 369.1 $\pm$ 10.9        | 349.3 $\pm$ 12.2   | <0.0001          |
| Calcium, mg                       | 967.6 $\pm$ 34.4                 | 957.4 $\pm$ 29.8        | 948.7 $\pm$ 33.3   | 0.21             |
| Magnesium, mg                     | 282.5 $\pm$ 8.3                  | 272.5 $\pm$ 6.6         | 262.6 $\pm$ 7.0    | <0.0001          |
| Phosphorus, mg                    | 1267.3 $\pm$ 35.6                | 1266.7 $\pm$ 30.9       | 1266.2 $\pm$ 33.8  | 0.92             |
| Copper, $\mu$ g                   | 793.3 $\pm$ 33.4                 | 756.9 $\pm$ 29.0        | 723.0 $\pm$ 28.6   | 0.002            |
| Iron, mg                          | 13.9 $\pm$ 0.4                   | 13.6 $\pm$ 0.3          | 13.3 $\pm$ 0.4     | 0.001            |
| Zinc, mg                          | 10.3 $\pm$ 0.3                   | 10.4 $\pm$ 0.4          | 10.4 $\pm$ 0.4     | 0.53             |
| Energy, kcal                      | 2070.1 $\pm$ 43.1                | 2047.7 $\pm$ 35.3       | 2025.7 $\pm$ 38.9  | 0.08             |

<sup>a</sup> SE: standard error

\*\* *p*-value from linear regression by modeling estimated average usual dietary intake of micronutrient by BMI status

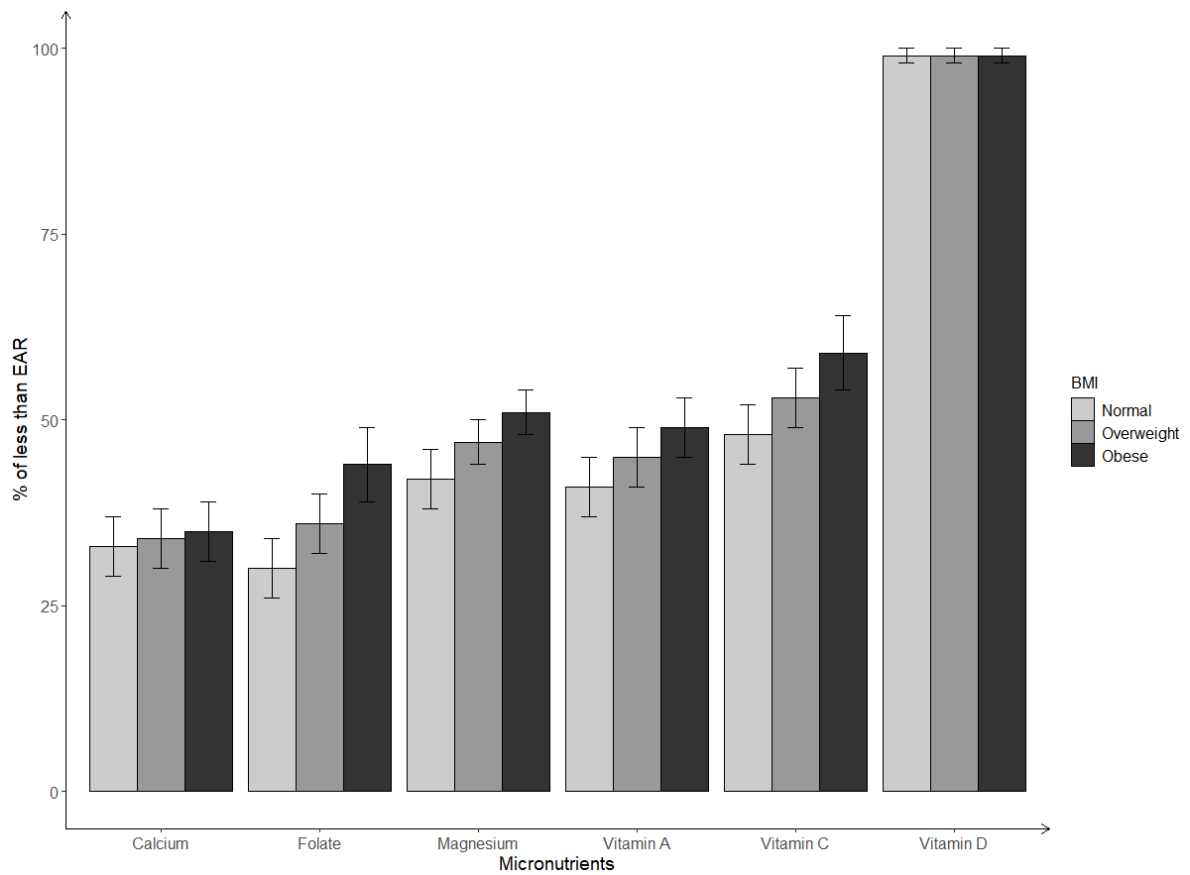

**Figure S1.** Percentage of non-Hispanic white women aged 19-39 years with dietary micronutrient intakes below EARs by body weight status <sup>a</sup>.

<sup>a</sup> Body weight status categorized by BMI into three groups: normal/under-weight: BMI  $\leq 25.0$ ; overweight:  $25.0 < \text{BMI} < 29.9$ ; obese:  $\text{BMI} \geq 30.0$ .
